# Supplementary material
Source: PubMed Central journal article supplement (PMC6527434)
Supplement: supp_7.2.E341_2018-0086-1-at.pdf [file supp_7.2.E341_2018-0086-1-at.pdf]

## APPENDIX 1 (as supplied by the authors)

### Exclusion criteria for home care:

We excluded patients if:

- 1) We were unable to track discharge
- 2) the assessment was written in hospital
- 3) sex information was missing
- 4) the assessment or entry date was missing
- 5) there was no CHESS score
- 6) any assessment was done in long-term care
- 7) client was living in assisted living home or residential care at time of referral
- 8) first assessment is not the initial assessment
- 9) client was aged less than 65 at time of initial assessment
- 10) the initial (baseline) assessment was prior to January 1, 2010.

### Exclusion criteria for long-term care

We excluded patients if:

- 1) Gender was "Other"
- 2) the assessment or entry date was missing
- 3) there was no CHESS score
- 4) if q1c (Short stays indicator) = 1, 2 or 3 and discharged within 90 days from the initial assessment.
- 5) Delete if p1aq (respite indicator) = 1 and discharged within 90 days from the initial assessment.
- 6) resident was aged less than 65 at time of initial assessment
- 7) the initial (baseline) assessment was prior to January 1, 2010.

| <b>Supplemental Table 1: Effect of selected co-variates</b> |                                  |                                |                                |
|-------------------------------------------------------------|----------------------------------|--------------------------------|--------------------------------|
| <b>AGE</b>                                                  |                                  |                                |                                |
| <b>MORTALITY</b>                                            |                                  |                                |                                |
|                                                             | <b>LOW (0)*</b>                  | <b>MEDIUM (1-2)*</b>           | <b>HIGH (3+)*</b>              |
| <b>LONG-TERM CARE FACILITY</b>                              |                                  |                                |                                |
| 75≤Age<85 versus<br>65≤Age <75                              | 1.441 (1.258,1.651)**,<br><.0001 | 1.247 (1.141,1.362),<br><.0001 | 1.177 (1.01,1.372),<br>0.0369  |
| 85≤Age<95 versus<br>65≤Age <75                              | 2.306 (2.021,2.631),<br><.0001   | 1.608 (1.477,1.752),<br><.0001 | 1.413 (1.217,1.639),<br><.0001 |
| 95≤Age versus<br>65≤Age <75                                 | 4.023 (3.436,4.709),<br><.0001   | 2.111 (1.91,2.334),<br><.0001  | 1.589 (1.324,1.907),<br><.0001 |
| <b>Home care</b>                                            |                                  |                                |                                |
| 75≤Age<85 versus<br>65≤Age <75                              | 0.97 (0.809,1.163),<br>0.7403    | 0.988 (0.904,1.08), 0.79       | 1.009 (0.915,1.114),<br>0.8535 |
| 85≤Age<95 versus<br>65≤Age <75                              | 1.331 (1.107,1.601),<br>0.0024   | 1.233 (1.123,1.353),<br><.0001 | 1.264 (1.137,1.404),<br><.0001 |
| 95≤Age versus<br>65≤Age <75                                 | 2.813 (2.079,3.805),<br><.0001   | 2.357 (2.02,2.75),<br><.0001   | 1.632 (1.336,1.992),<br><.0001 |

| <b>HOSPITALIZATION</b>                              |                                |                                |                                |
|-----------------------------------------------------|--------------------------------|--------------------------------|--------------------------------|
|                                                     | LOW (0)                        | MEDIUM (1-2)                   | HIGH (3+)                      |
| <b>LONG-TERM CARE FACILITY</b>                      |                                |                                |                                |
| 75≤Age<85 <i>versus</i><br>65≤Age <75               | 1.054 (1.015,1.095),<br>0.0062 | 0.955 (0.916,0.996),<br>0.0319 | 0.994 (0.857,1.153),<br>0.9388 |
| 85≤Age<95 <i>versus</i><br>65≤Age <75               | 1.091 (1.05,1.133),<br><.0001  | 0.851 (0.817,0.888),<br><.0001 | 0.831 (0.718,0.961),<br>0.0125 |
| 95≤Age <i>versus</i><br>65≤Age <75                  | 1.046 (0.983,1.112),<br>0.1539 | 0.645 (0.608,0.685),<br><.0001 | 0.567 (0.466,0.69),<br><.0001  |
| <b>Home care</b>                                    |                                |                                |                                |
| 75≤Age<85 <i>versus</i><br>65≤Age <75               | 0.944 (0.889,1.003),<br>0.0605 | 0.927 (0.897,0.958),<br><.0001 | 0.952 (0.897,1.009),<br>0.097  |
| 85≤Age<95 <i>versus</i><br>65≤Age <75               | 1.063 (0.999,1.132),<br>0.0556 | 0.985 (0.952,1.019),<br>0.3881 | 0.975 (0.915,1.038),<br>0.4212 |
| 95≤Age <i>versus</i><br>65≤Age <75                  | 1.537 (1.358,1.739),<br><.0001 | 1.17 (1.091,1.255),<br><.0001  | 0.984 (0.868,1.116),<br>0.8052 |
| <b>CHRONIC OBSTRUCTIVE PULMONARY DISEASE (COPD)</b> |                                |                                |                                |
| <b>MORTALITY</b>                                    |                                |                                |                                |
|                                                     | LOW (0)                        | MEDIUM (1-2)                   | HIGH (3+)                      |
| <b>LONG-TERM CARE FACILITY</b>                      |                                |                                |                                |
|                                                     | 1.51 (1.383,1.647),<br><.0001  | 1.287 (1.224,1.353),<br><.0001 | 0.953 (0.871,1.044),<br>0.3021 |
| <b>Home care</b>                                    |                                |                                |                                |
|                                                     | 1.539 (1.27,1.865),<br><.0001  | 1.187 (1.097,1.285),<br><.0001 | 0.997 (0.92,1.081),<br>0.9475  |
| <b>HOSPITALIZATION</b>                              |                                |                                |                                |
| <b>LONG-TERM CARE FACILITY</b>                      |                                |                                |                                |
|                                                     | 1.41 (1.364,1.457),<br><.0001  | 1.24 (1.204,1.277),<br><.0001  | 1.057 (0.963,1.16),<br>0.2431  |
| <b>Home care</b>                                    |                                |                                |                                |
|                                                     | 1.417 (1.323,1.517),<br><.0001 | 1.152 (1.119,1.187),<br><.0001 | 1.006 (0.961,1.053),<br>0.7966 |
| <b>PNEUMONIA</b>                                    |                                |                                |                                |
| <b>MORTALITY</b>                                    |                                |                                |                                |
|                                                     | LOW (0)*                       | MEDIUM (1-2)                   | HIGH (3+)                      |
| <b>LONG-TERM CARE FACILITY</b>                      |                                |                                |                                |
|                                                     | 1.545 (1.195,1.997),<br>0.0009 | 1.814 (1.611,2.043),<br><.0001 | 2.019 (1.698,2.402),<br><.0001 |
| <b>Home care</b>                                    |                                |                                |                                |
|                                                     | 1.539 (1.27,1.865),<br><.0001  | 1.244 (1.05,1.475),<br>0.0118  | 1.197 (1.026,1.397),<br>0.0225 |
| <b>HOSPITALIZATION</b>                              |                                |                                |                                |
| <b>LONG-TERM CARE FACILITY</b>                      |                                |                                |                                |

|                                                                                                                                                                                                                                                                                                                                                                                                     |                                |                               |                               |
|-----------------------------------------------------------------------------------------------------------------------------------------------------------------------------------------------------------------------------------------------------------------------------------------------------------------------------------------------------------------------------------------------------|--------------------------------|-------------------------------|-------------------------------|
|                                                                                                                                                                                                                                                                                                                                                                                                     | 1.505 (1.343,1.685),<br><.0001 | 1.698 (1.567,1.84),<br><.0001 | 1.945 (1.624,2.33),<br><.0001 |
| <b>Home care</b>                                                                                                                                                                                                                                                                                                                                                                                    |                                |                               |                               |
|                                                                                                                                                                                                                                                                                                                                                                                                     | 1.417 (1.323,1.517),<br><.0001 | 1.16 (1.081,1.244),<br><.0001 | 1.13 (1.027,1.243),<br>0.0126 |
| <p>*LOW corresponds to Changes in Health, End-Stage Disease, and Signs and Symptoms Scale score of 0, MEDIUM corresponds to Changes in Health, End-Stage Disease, and Signs and Symptoms Scale score of 1-2, HIGH corresponds to Changes in Health, End-Stage Disease, and Signs and Symptoms Scale score of 3+ (3-5),</p> <p>**Numerical ranges in brackets represent 95% confidence intervals</p> |                                |                               |                               |
